# Supplementary material for: Promising novel thermoelectric materials: two-dimensional penta-like PtPX (X = S, Se, Te) nanosheets
Source: Royal Society of Chemistry journal article supplement (doi:10.1039/d3tc01160g), 2023-01-01
Supplement: d3tc01160g1.pdf [file d3tc01160g1.pdf]

# Supporting Information

## **Promising novel thermoelectric materials: Two-dimensional penta-like PtPX (X=S, Se, Te) nanosheets**

Haihua Huang<sup>a</sup>, Wei Li<sup>a</sup>, Chengchao Hu<sup>a</sup>, Xiaofeng Fan<sup>b,\*</sup>

<sup>a</sup> School of Materials Science and Engineering, Liaocheng University, Liaocheng 252059, China

<sup>b</sup> Key Laboratory of Automobile Materials (Jilin University), Ministry of Education, and College of Materials Science and Engineering, Jilin University, Changchun, 130012, China;

Corresponding author:

\*E-mail: xffan@jlu.edu.cn(X. Fan)



Fig.S1. Bond length of P-P, Pt-P and Pt-X (X=S, Se, Te) as a function of molecular dynamical duration time at 1000 K for (a) PtPS, (b) PtPSe and (c) PtPTe monolayer



Fig.S2. Seebeck coefficient as a function of carrier concentration for p-type and n-type for (a, d) PtPS, (b, e) PtPSe and (c, f) PtPTE monolayer along x and y directions at different temperature.



Fig.S3.  $\sigma/\tau$  as a function of carrier concentration for p-type and n-type along x and y directions for (a, d) PtPS, (b, e) PtPSe and (c, f) PtPTe monolayer at different temperature.



Fig.S4. Electronic thermal conductivity as a function of carrier concentration for p-type and n-type along x and y directions for (a, b) PtPS, (c, d) PtPSe and (e, f) PtPTe monolayer at 300 K.
